# Supplementary material for: Imaging neuropeptide release at synapses with a genetically engineered reporter
Source: eLife. 2019 Jun 26;8:e46421. doi: 10.7554/eLife.46421 (PMC6609332; doi:10.7554/eLife.46421)
Supplement: Supplementary file 1. — Summary of current techniques used for neuropeptide release, including microdialysis, antibody-coated microprobes, GFP-tagged propeptide imaging and NPRR. NA, ‘not applicable’ [file elife-46421-supp1.xlsx]

## Sheet: Table1
Supplementary Table 1. Current techniques for neuropeptide release measurement
Current techniques for neuropeptide release measurement
	Chemical specificity	Genetic specificity	Spatial specificity	Temporal dynamics	Signal relative to background
Microdialysis	Low	NA	Brain region	minutes-days	High
Antibody-coated microprobe	High	NA	Brain region	minutes-days	High
GFP-tagged propeptide imaging	High	Yes	Neuron of interest	~seconds	Low
NPRR	High	Yes	Neuron of interest	~subseconds	High
